# Supplementary material for: DNA Methylation Targets Influenced by Bisphenol A and/or Genistein Are Associated with Survival Outcomes in Breast Cancer Patients
Source: MDPI journal article supplement (doi:10.3390/genes8050144), 2017-05-15
Supplement: s1 [file s1]

# **DNA Methylation Targets Influenced by Bisphenol A and/or Genistein Are Associated with Survival Outcomes in Breast Cancer Patients**

Rohit R. Jadhav, Julia Santucci-Pereira, Yao V. Wang, Joseph Liu, Theresa D Nguyen, Jun Wang, Sarah Jenkins, Jose Russo, Tim H.-M. Huang, Victor X. Jin and Coral A. Lamartiniere

| Samples               | Fastq | UMT  | Recovered<br>NUT | CMT  |
|-----------------------|-------|------|------------------|------|
| Sample_BPA_3029       | 40.8  | 27.7 | 10.7             | 38.4 |
| Sample_BPA_3030       | 40.5  | 27.4 | 11               | 38.4 |
| Sample_BPA_3031       | 39.1  | 26.9 | 10.2             | 37.1 |
| Sample_BPA_3032       | 37.8  | 25   | 10.8             | 35.8 |
| Sample_BPA_3033       | 39.9  | 26.1 | 11.6             | 37.6 |
| Sample_BPA_Gen_3330   | 39.5  | 27.9 | 9.7              | 37.7 |
| Sample_BPA_Gen_3331   | 35.9  | 24.7 | 9.4              | 34.1 |
| Sample_BPA_Gen_3332   | 44.4  | 30.3 | 11.8             | 42.1 |
| Sample_BPA_Gen_3333   | 38.2  | 24.9 | 11.1             | 36   |
| Sample_BPA_Gen_3334   | 45.6  | 29.3 | 13.7             | 43   |
| Sample_CTRL_3229      | 41.4  | 26.1 | 13               | 39   |
| Sample_Ctrl_3232      | 44.9  | 30.9 | 11.2             | 42.1 |
| Sample_Ctrl_3233      | 37.9  | 23.9 | 11.9             | 35.8 |
| Sample_Ctrl_3235      | 44.8  | 31   | 11.1             | 42.1 |
| Sample_Ctrl_3236      | 33.5  | 20.6 | 11               | 31.6 |
| Sample_Genistein_3280 | 53.6  | 32.2 | 18.2             | 50.4 |
| Sample_Genistein_3281 | 44.6  | 27.5 | 14.7             | 42.2 |
| Sample_Genistein_3282 | 46.7  | 31.1 | 12.9             | 44   |
| Sample_Genistein_3283 | 58.4  | 39.4 | 15.7             | 55.1 |
| Sample_Genistein_3284 | 36.4  | 25.3 | 8.9              | 34.2 |

Supplementary Figure S2

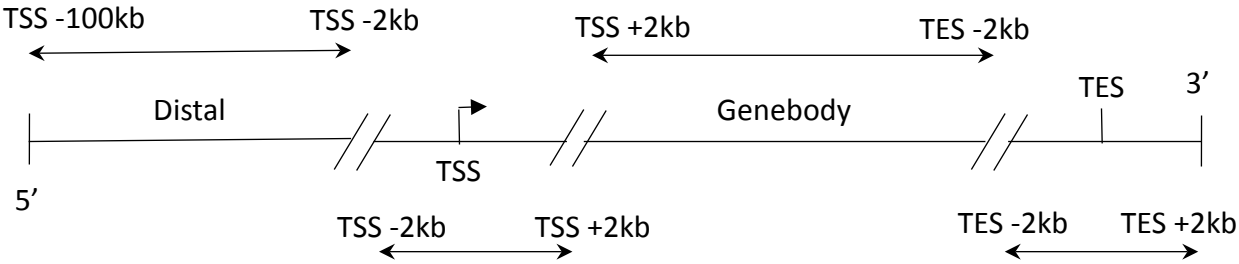

Hyper-methylated Genes

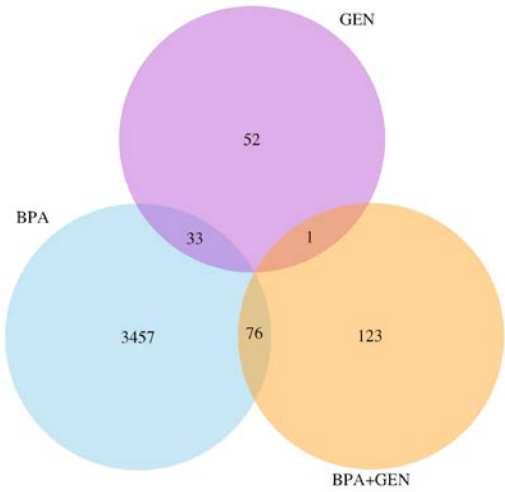

Hypo-methylated Genes

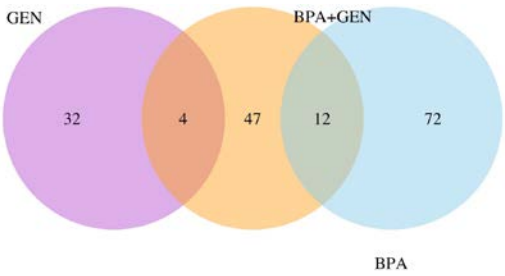

A

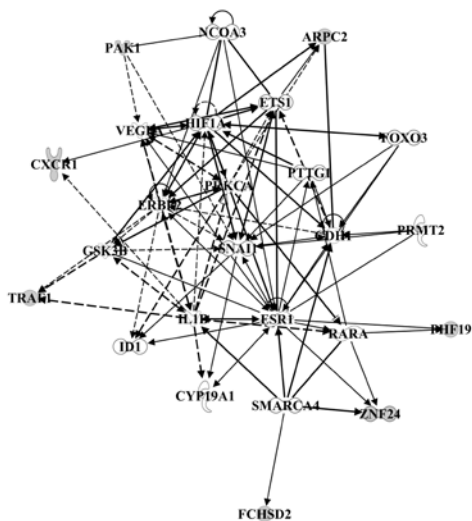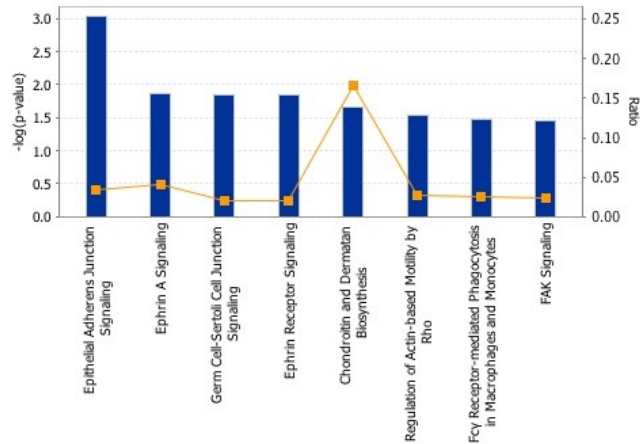

B

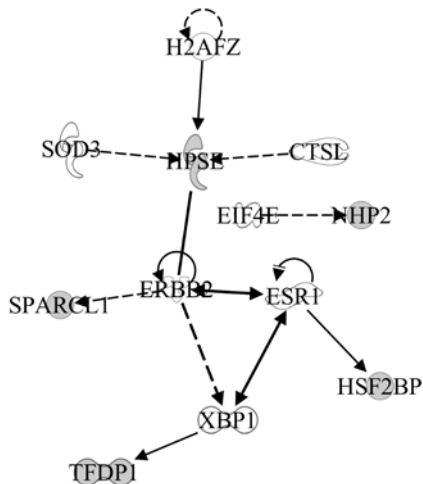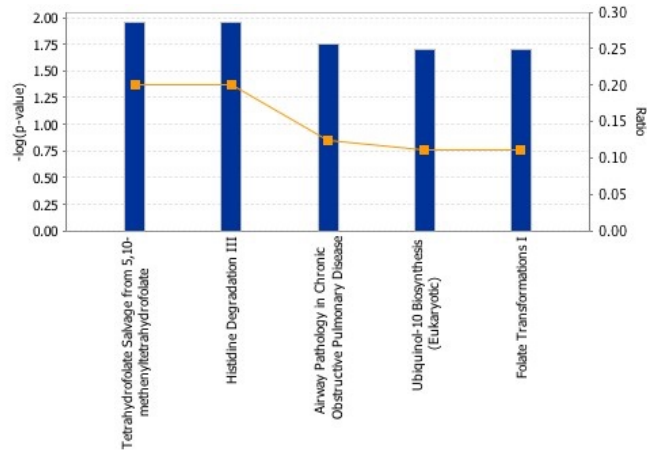

C

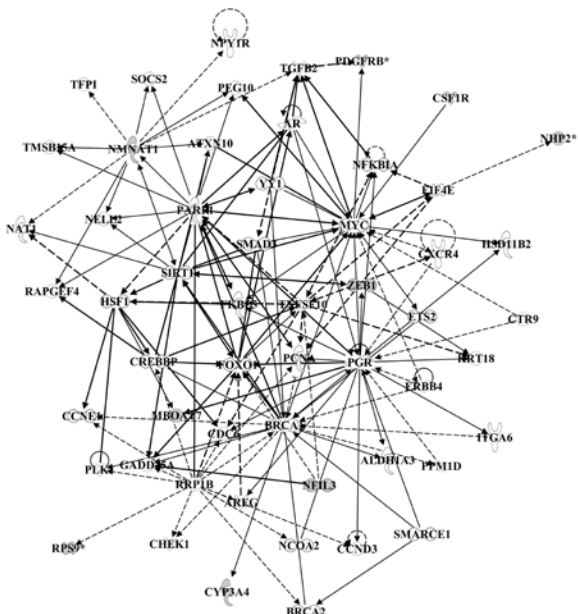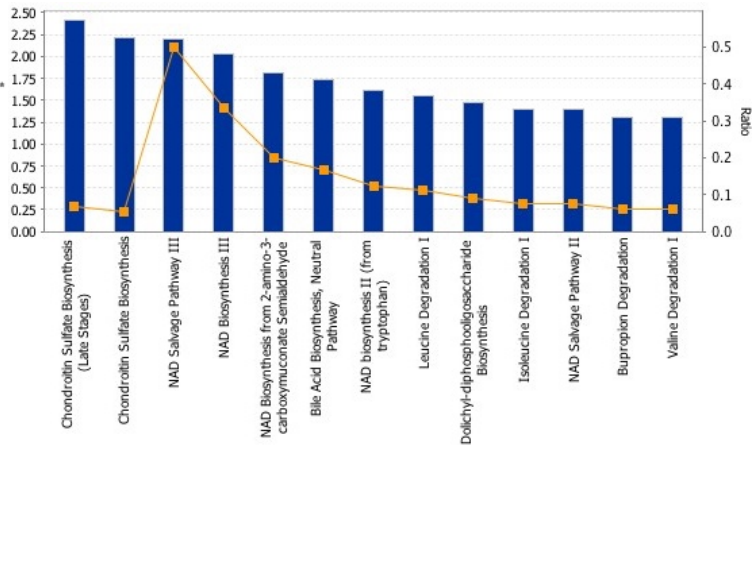

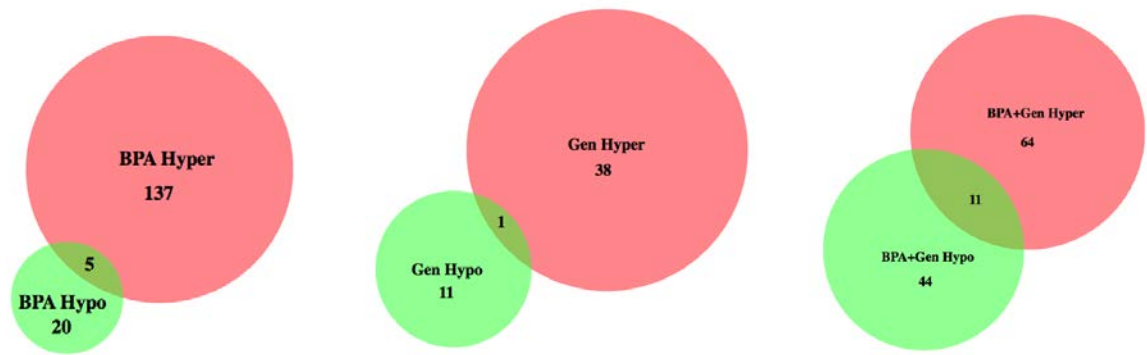

Supplementary Figure S6

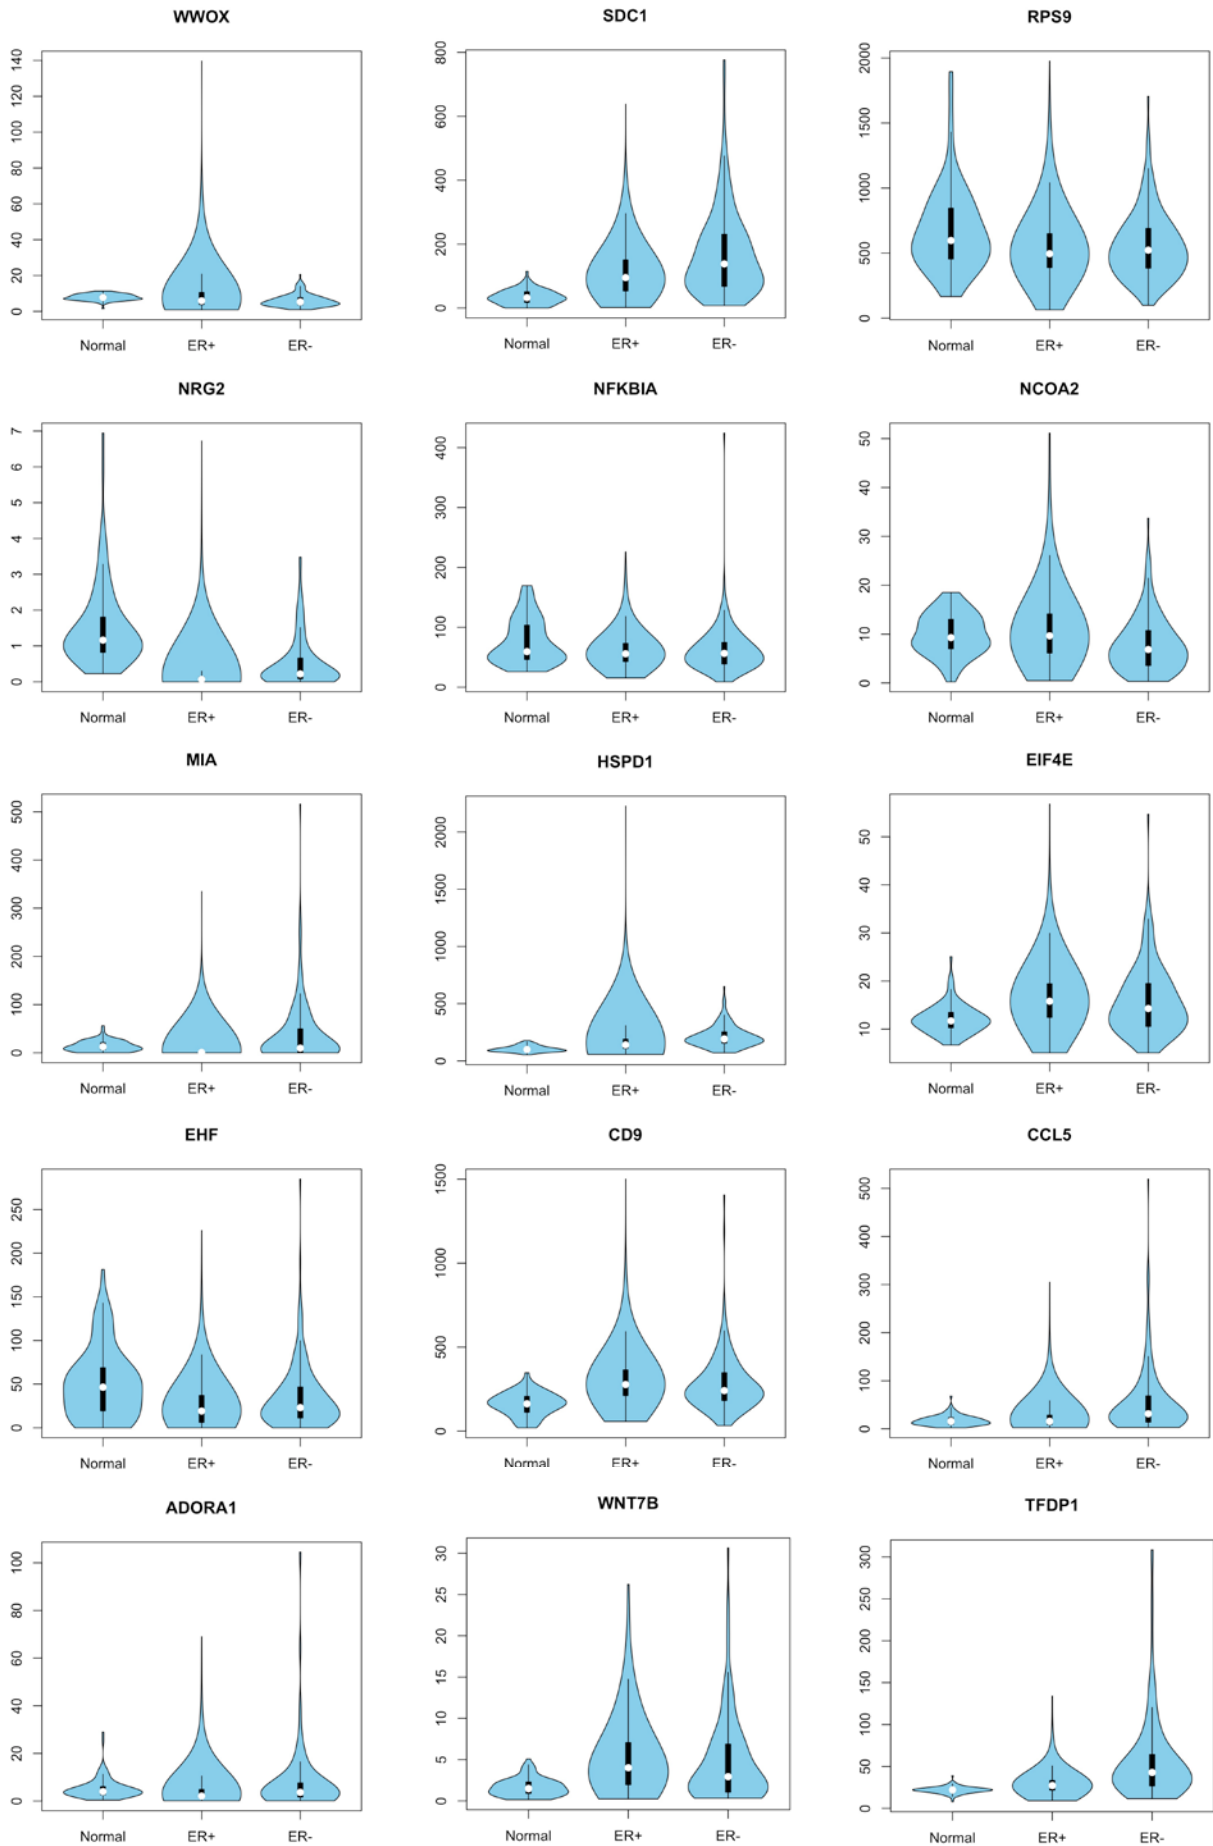

**PRKG1**

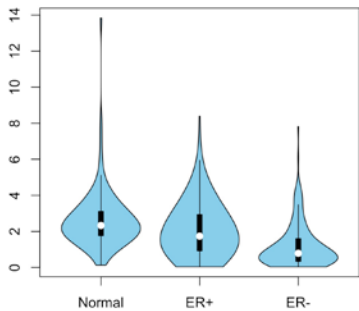

**NOL3**

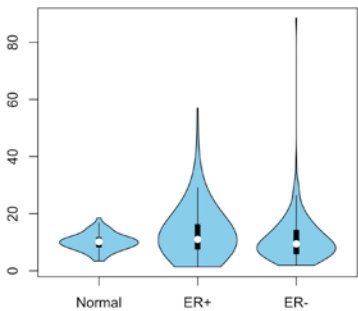

**MAPK4**

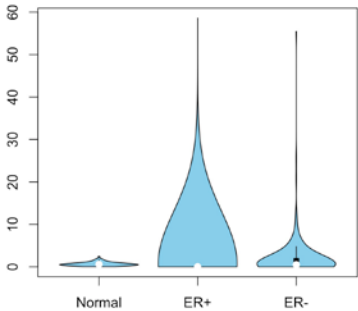

**LTBP1**

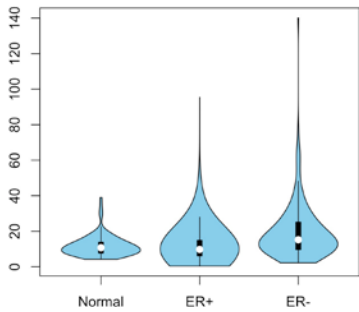

**FOXO3**

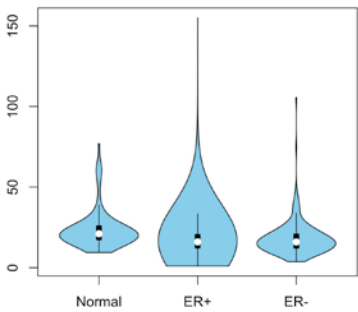

**DPYD**

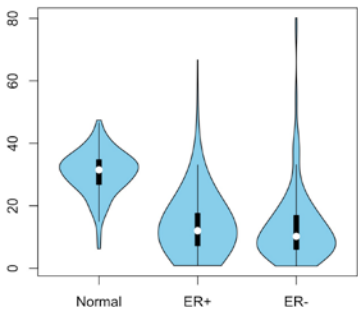

**CDKN2C**

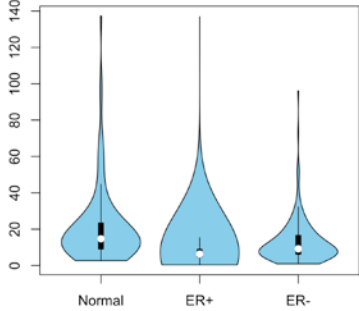

**ARPC2**

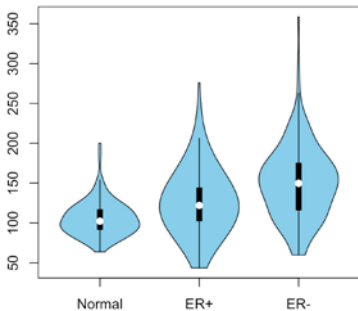

**AREG**

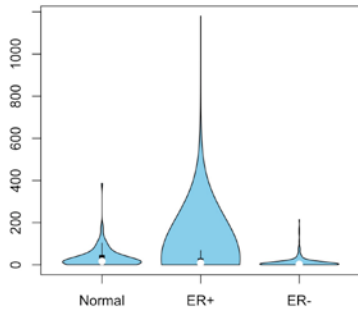

## Supplementary Figures

**Supplementary Fig. S1:** Figure showing a total number of reads obtained from sequencing each sample (Fastq), reads uniquely mapped to the genome (UMT), reads not uniquely mapped to the genome (NUT), and total recovered reads using LONUT (CMT).

**Supplementary Fig. S2.** Illustration of the investigated genomic regions and how these different regions defined in the DNA methylation analysis were selected.

**Supplementary Fig. S3.** Overlap of hyper and hypo methylated genes identified from each exposure group.

**Supplementary Fig. S4.** Network and pathway analyses of hypomethylated genes in adult mammary glands of rats exposed prepubertally to BPA  $\pm$  GEN.

**Supplementary Fig. S5.** Overlap of differentially methylated genes along with the genes interacting with them as identified in top 5 networks for each exposure group.

**Supplementary Figure S6.** Boxplots for genes identified to be differentially expressed in TCGA patient groups compared to normal.

## Supplementary Tables

**Supplementary Table S1:** List of genes identified to be differentially methylated in each exposure group compared to controls.

**Supplementary Table S2:** Top 5 networks identified in each exposure group along with the list of genes belonging to them.
